# Supplementary material for: Optoelectronic Response to the Fluor Ion Bond on 4-(4,4,5,5-Tetramethyl-1,3,2-dioxoborolan-2-yl)benzaldehyde
Source: MDPI journal article supplement (doi:10.3390/ijms25095000), 2024-05-03
Supplement: s1 [file s1]

## Supporting Information

### Optoelectronic Response to the Fluor Ion Bond on

### 4-(4,4,5,5-Tetramethyl-1,3,2-dioxaborolan-2-yl)benzaldehyde

Ulises J. Guevara <sup>1</sup>, Jesús Núñez <sup>2</sup>, Laura M. Pérez <sup>3,\*</sup>, Anton Tiutiunnyk <sup>4</sup>, Neudo Urdaneta <sup>5</sup>, Eduardo Cisternas <sup>6</sup> and David Laroze <sup>1</sup>

<sup>1</sup> Instituto de Alta Investigación, Universidad de Tarapacá, Arica 1000000, Chile;

uguevara@academicos.uta.cl (U.J.G.)

<sup>2</sup> Departamento de Biología, Universidad Politécnica Territorial del Oeste de Sucre “Clodosbaldo Russian”, Cumaná 6101, Venezuela

<sup>3</sup> Departamento de Ingeniería Industrial y de Sistemas, Universidad de Tarapacá, Arica 1000000, Chile

<sup>4</sup> Departamento de Física, FACI, Universidad de Tarapacá, Arica 1000000, Chile

<sup>5</sup> Departamento de Química, Universidad Simón Bolívar (USB), Caracas 1020-A, Venezuela

<sup>6</sup> Departamento de Ciencias Físicas, Universidad de La Frontera, Casilla 54-D, Temuco 4811230, Chile; eduardo.cisternas@ufrontera.cl

\* Correspondence: lperez@academicos.uta.cl

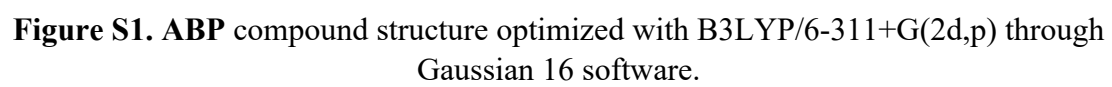

**Table S1.** Atomic coordinates of the **ABP** compound structure optimized with B3LYP/6-311+G(2d,p) through Gaussian 16 software.

| N° | Atom | x        | y         | z        |
|----|------|----------|-----------|----------|
| 1  | C    | 0.95534  | 0.08597   | -0.00889 |
| 2  | C    | 1.71725  | -1.08696  | 0.13230  |
| 3  | C    | 3.10121  | -1.04616  | 0.12781  |
| 4  | C    | 3.76081  | 0.17951   | -0.02017 |
| 5  | C    | 3.01719  | 1.35393   | -0.16199 |
| 6  | C    | 1.62951  | 1.30537   | -0.15558 |
| 7  | H    | 1.20982  | -2.03758  | 0.24584  |
| 8  | H    | 3.68767  | -1.94999  | 0.23675  |
| 9  | H    | 3.53150  | 2.30223   | -0.27630 |
| 10 | H    | 1.05952  | 2.22017   | -0.26475 |
| 11 | C    | 5.23386  | 0.25900   | -0.02958 |
| 12 | O    | 5.98473  | -0.68921  | 0.08323  |
| 13 | H    | 5.64175  | 1.28148   | -0.15108 |
| 14 | C    | -2.77759 | 0.74063   | 0.09104  |
| 15 | C    | -2.72347 | -0.82673  | -0.08304 |
| 16 | O    | -1.31457 | -1.12079  | 0.19140  |
| 17 | O    | -1.39431 | 1.13208   | -0.19260 |
| 18 | C    | -2.99387 | -1.29324  | -1.51428 |
| 19 | H    | -2.75475 | -2.35499  | -1.59079 |
| 20 | H    | -4.04270 | -1.15957  | -1.78399 |
| 21 | H    | -2.37846 | -0.75381  | -2.23576 |
| 22 | C    | -3.57989 | -1.61461  | 0.89836  |
| 23 | H    | -4.63611 | -1.36756  | 0.77072  |
| 24 | H    | -3.45939 | -2.68310  | 0.71189  |
| 25 | H    | -3.29863 | -1.41612  | 1.93126  |
| 26 | C    | -3.07047 | 1.1877990 | 1.52401  |
| 27 | H    | -2.90447 | 2.26356   | 1.59900  |
| 28 | H    | -4.10592 | 0.98247   | 1.80040  |
| 29 | H    | -2.41485 | 0.69229   | 2.24155  |
| 30 | C    | -3.69306 | 1.46695   | -0.88457 |
| 31 | H    | -4.72878 | 1.14743   | -0.75005 |
| 32 | H    | -3.64579 | 2.54126   | -0.69855 |
| 33 | H    | -3.40553 | 1.28819   | -1.91934 |
| 34 | B    | -0.60449 | 0.03163   | -0.00308 |

**Table S2.** Atomic coordinates of the **ABP** compound structure optimized with PBE through CASTEP software.

| N° | Atom | x       | y       | Z        |
|----|------|---------|---------|----------|
| 1  | C    | 5.70252 | 5.82780 | 8.59590  |
| 2  | C    | 5.74848 | 4.64100 | 7.83306  |
| 3  | C    | 5.73780 | 4.67784 | 6.44436  |
| 4  | C    | 5.67252 | 5.91228 | 5.77890  |
| 5  | C    | 5.63436 | 7.10268 | 6.52212  |
| 6  | C    | 5.65272 | 7.06008 | 7.91550  |
| 7  | H    | 5.78796 | 3.67920 | 8.34606  |
| 8  | H    | 5.77188 | 3.76908 | 5.84046  |
| 9  | H    | 5.58468 | 8.05812 | 5.99148  |
| 10 | H    | 5.61828 | 7.87560 | 8.48898  |
| 11 | C    | 5.62800 | 5.97336 | 4.30092  |
| 12 | O    | 5.63844 | 5.00880 | 3.54852  |
| 13 | H    | 5.57616 | 7.01328 | 3.88836  |
| 14 | C    | 5.68488 | 6.46524 | 12.35196 |
| 15 | C    | 5.62008 | 4.85928 | 12.27708 |
| 16 | O    | 5.52684 | 4.58808 | 10.84518 |
| 17 | O    | 5.82384 | 6.86868 | 10.95480 |
| 18 | C    | 4.38180 | 4.24236 | 12.92670 |
| 19 | H    | 4.40652 | 3.15060 | 12.80628 |
| 20 | H    | 4.33920 | 4.46352 | 14.00130 |
| 21 | H    | 3.46176 | 4.60920 | 12.45492 |
| 22 | C    | 6.88560 | 4.15608 | 12.77496 |
| 23 | H    | 7.06608 | 4.35924 | 13.83858 |
| 24 | H    | 6.77532 | 3.06996 | 12.65184 |
| 25 | H    | 7.76952 | 4.46808 | 12.20364 |
| 26 | C    | 6.90264 | 7.01544 | 13.09338 |
| 27 | H    | 6.88380 | 8.11380 | 13.07322 |
| 28 | H    | 6.91308 | 6.69612 | 14.14836 |
| 29 | H    | 7.83612 | 6.68892 | 12.61836 |
| 30 | C    | 4.40340 | 7.12332 | 12.87018 |
| 31 | H    | 4.18968 | 6.82488 | 13.90482 |
| 32 | H    | 4.51596 | 8.21616 | 12.84894 |
| 33 | H    | 3.53868 | 6.86520 | 12.24468 |
| 34 | B    | 5.68704 | 5.76312 | 10.15542 |

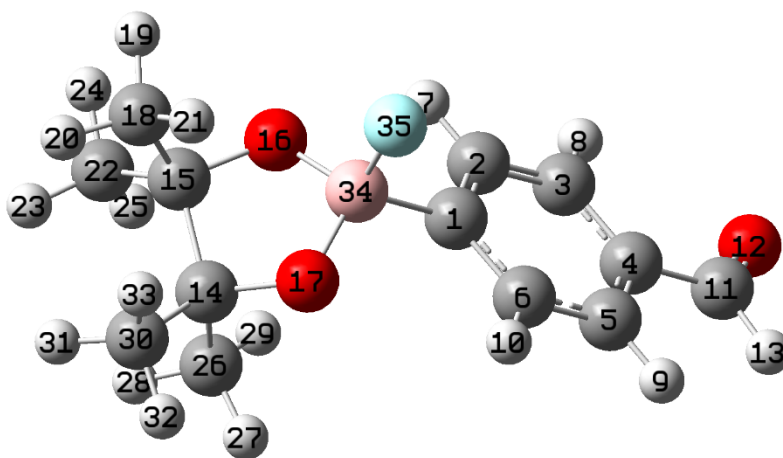

**Figure S2.** ABPF compound structure optimized with B3LYP/6-311+G(2d,p) through Gaussian 16 software.

**Table S3.** Atomic coordinates of the **ABPF** anion structure optimized with UB3LYP/6-311+G(2d,p) through Gaussian 16 software.

| N° | Atom | x        | y        | z        |
|----|------|----------|----------|----------|
| 1  | C    | -0.89467 | 0.03138  | 0.49867  |
| 2  | C    | -1.61722 | -1.11442 | 0.11447  |
| 3  | C    | -2.97071 | -1.06958 | -0.17521 |
| 4  | C    | -3.66565 | 0.14589  | -0.09220 |
| 5  | C    | -2.96626 | 1.30021  | 0.28395  |
| 6  | C    | -1.60980 | 1.23697  | 0.57086  |
| 7  | H    | -1.09085 | -2.05963 | 0.03825  |
| 8  | H    | -3.51026 | -1.96294 | -0.46840 |
| 9  | H    | -3.49822 | 2.24528  | 0.34704  |
| 10 | H    | -1.08561 | 2.14389  | 0.85269  |
| 11 | C    | -5.09378 | 0.24300  | -0.38559 |
| 12 | O    | -5.82342 | -0.67587 | -0.72456 |
| 13 | H    | -5.51454 | 1.26369  | -0.27770 |
| 14 | C    | 2.41146  | 0.76762  | -0.52943 |
| 15 | C    | 2.65122  | -0.75435 | -0.20696 |
| 16 | O    | 1.36211  | -1.17302 | 0.23934  |
| 17 | O    | 1.46261  | 1.14861  | 0.46334  |
| 18 | C    | 3.67009  | -0.95975 | 0.92763  |
| 19 | H    | 3.63881  | -2.00605 | 1.24033  |
| 20 | H    | 4.69061  | -0.72987 | 0.60934  |
| 21 | H    | 3.42126  | -0.34262 | 1.79045  |
| 22 | C    | 3.06209  | -1.60861 | -1.40602 |
| 23 | H    | 4.00538  | -1.26021 | -1.83659 |
| 24 | H    | 3.20223  | -2.64479 | -1.08755 |
| 25 | H    | 2.29941  | -1.59738 | -2.18428 |
| 26 | C    | 1.78389  | 0.97785  | -1.91853 |
| 27 | H    | 1.45464  | 2.01632  | -1.99955 |
| 28 | H    | 2.49254  | 0.78052  | -2.72729 |
| 29 | H    | 0.91259  | 0.33566  | -2.05321 |
| 30 | C    | 3.65075  | 1.65391  | -0.40134 |
| 31 | H    | 4.43950  | 1.33742  | -1.09011 |
| 32 | H    | 3.38912  | 2.68741  | -0.64324 |
| 33 | H    | 4.04580  | 1.63725  | 0.61392  |
| 34 | B    | 0.69368  | -0.03456 | 0.87727  |
| 35 | F    | 0.75114  | -0.12997 | 2.33144  |

**Table S4.** Atomic coordinates of the **ABPF** anion structure optimized with PBE through CASTEP software.

| N° | Atom | x       | y       | z         |
|----|------|---------|---------|-----------|
| 1  | C    | 5.42532 | 5.86128 | -9.69095  |
| 2  | C    | 5.81772 | 4.71036 | -10.41105 |
| 3  | C    | 6.07920 | 4.76364 | -11.77487 |
| 4  | C    | 5.97540 | 5.99280 | -12.45754 |
| 5  | C    | 5.60304 | 7.15188 | -11.75378 |
| 6  | C    | 5.34072 | 7.08492 | -10.38787 |
| 7  | H    | 5.89464 | 3.75600 | -9.88475  |
| 8  | H    | 6.36192 | 3.86844 | -12.33195 |
| 9  | H    | 5.52108 | 8.10204 | -12.28901 |
| 10 | H    | 5.04864 | 7.99068 | -9.85150  |
| 11 | C    | 6.25572 | 6.09876 | -13.89508 |
| 12 | O    | 6.59256 | 5.18040 | -14.63361 |
| 13 | H    | 6.13944 | 7.12704 | -14.32030 |
| 14 | C    | 6.45720 | 6.60240 | -6.39255  |
| 15 | C    | 6.17184 | 5.04036 | -6.17310  |
| 16 | O    | 5.71080 | 4.63896 | -7.43850  |
| 17 | O    | 5.49012 | 6.97500 | -7.33856  |
| 18 | C    | 5.03040 | 4.84476 | -5.12962  |
| 19 | H    | 4.72704 | 3.79056 | -5.16553  |
| 20 | H    | 5.38764 | 5.07660 | -4.11673  |
| 21 | H    | 4.16004 | 5.46588 | -5.37396  |
| 22 | C    | 7.37652 | 4.19748 | -5.76783  |
| 23 | H    | 7.80504 | 4.55964 | -4.82144  |
| 24 | H    | 7.06836 | 3.15264 | -5.61925  |
| 25 | H    | 8.15508 | 4.21500 | -6.54037  |
| 26 | C    | 7.85940 | 6.80616 | -7.04368  |
| 27 | H    | 7.92840 | 7.85316 | -7.36611  |
| 28 | H    | 8.65944 | 6.60456 | -6.31883  |
| 29 | H    | 7.98048 | 6.15972 | -7.92243  |
| 30 | C    | 6.34800 | 7.47696 | -5.14577  |
| 31 | H    | 7.05696 | 7.14168 | -4.37380  |
| 32 | H    | 6.59064 | 8.51880 | -5.39771  |
| 33 | H    | 5.33328 | 7.45464 | -4.73100  |
| 34 | B    | 5.01660 | 5.77656 | -8.12174  |
| 35 | F    | 3.61968 | 5.68044 | -7.97962  |

NATURAL ATOMIC ORBITAL AND NATURAL BOND ORBITAL (NBO)  
ANALYSIS OF THE ATOMS OF THE FORMYL GROUP OF THE **ABP** COMPOUND

**Table S5.** Occupancy, bond orbital, coefficients and hybrids of the atoms C4, C11, H13 and O12.

| Occupancy | Bond orbital     | coefficients         |         | hybrids      |                       |         |         |
|-----------|------------------|----------------------|---------|--------------|-----------------------|---------|---------|
| 1.98176   | BD(1)<br>C4–C11  | 0.7255*C<br>(52.64%) | 4s      | (30.25%<br>) | p2.30<br>(69.69<br>%) | d0.00   | (0.06%) |
|           |                  |                      | -0.0001 | 0.5500       | 0.0048                | 0.0012  | -0.0004 |
|           |                  |                      | 0.8341  | 0.0066       | -0.0025               | -0.0030 | 0.0341  |
|           |                  |                      | -0.0036 | 0.0001       | -0.0003               | -0.0040 | 0.0004  |
|           |                  |                      | 0.0000  | 0.0000       | 0.0001                | 0.0025  | 0.0000  |
|           |                  |                      | -0.0003 | -0.0007      | 0.0010                | 0.0151  | 0.0131  |
|           |                  |                      | -0.0122 | -0.0028      |                       |         |         |
|           |                  | 0.6882*C<br>(47.36%) | 11s     | (38.10%<br>) | p1.62<br>(61.86<br>%) | d0.00   | (0.05%) |
|           |                  |                      | 0.0003  | 0.6172       | 0.0003                | 0.0055  | 0.0010  |
|           |                  |                      | -0.7824 | -0.0014      | 0.0130                | 0.0013  | -0.0778 |
|           |                  |                      | -0.0060 | 0.0011       | 0.0004                | 0.0092  | 0.0007  |
|           |                  |                      | -0.0001 | 0.0000       | 0.0052                | -0.0005 | -0.0006 |
|           |                  |                      | 0.0001  | 0.0012       | 0.0009                | 0.0185  | -0.0050 |
|           |                  |                      | -0.0049 | .0.0071      |                       |         |         |
| 1.99591   | BD(1)<br>C11–O12 | 0.5897*C<br>(34.78%) | 11s     | (32.18%<br>) | p2.10<br>(67.71<br>%) | d0.00   | (0.11%) |
|           |                  |                      | 0.0000  | 0.5628       | -0.0709               | -0.0039 | -0.0026 |
|           |                  |                      | 0.5077  | -0.0666      | 0.0010                | -0.0001 | -0.6380 |
|           |                  |                      | 0.0432  | 0.0082       | -0.0022               | 0.0764  | -0.0051 |
|           |                  |                      | -0.0010 | 0.0003       | -0.0263               | 0.0067  | 0.0031  |
|           |                  |                      | -0.0008 | -0.0041      | 0.0009                | -0.0087 | 0.0009  |
|           |                  |                      | -0.0146 | 0.0038       |                       |         |         |
|           |                  | 0.8076*O<br>(65.22%) | 12s     | (41.15%<br>) | p1.42<br>(58.36<br>%) | d0.01   | (0.49%) |
|           |                  |                      | 0.0000  | 0.6410       | -0.0252               | 0.0012  | -0.0002 |
|           |                  |                      | -0.4673 | 0.0050       | 0.0005                | 0.0006  | 0.6000  |
|           |                  |                      | -0.0134 | 0.0014       | -0.0011               | -0.0709 | 0.0016  |
|           |                  |                      | -0.0002 | 0.0001       | -0.0596               | -0.0029 | 0.0071  |
|           |                  |                      | 0.0004  | -0.0083      | -0.0005               | -0.0132 | -0.0010 |
|           |                  |                      | -0.0324 | -0.0016      |                       |         |         |



Table S5. (continued)

| Occupancy | Bond orbital     | coefficients         |         |          | hybrids               |         |         |
|-----------|------------------|----------------------|---------|----------|-----------------------|---------|---------|
| 1.97832   | BD(2)<br>C4–C11  | 0.5746*C<br>(33.01%) | 11s     | (0.00%)  | p1.00<br>(99.87<br>%) | d0.00   | (0.13%) |
|           |                  |                      | 0.0000  | -0.0003  | 0.0000                | 0.0001  | 0.0000  |
|           |                  |                      | -0.0003 | 0.0000   | 0.0000                | 0.0000  | 0.1182  |
|           |                  |                      | 0.0036  | 0.0031   | -0.0011               | 0.9915  | 0.0303  |
|           |                  |                      | 0.0267  | -0.0091  | 0.0025                | 0.0006  | 0.0211  |
|           |                  |                      | 0.0053  | -0.0270  | -0.0004               | 0.0032  | 0.0000  |
|           |                  |                      | 0.0056  | 0.0001   |                       |         |         |
|           |                  | 0.8185*C<br>(66.99%) | 12s     | (0.00%)  | p1.00<br>(99.65<br>%) | d0.00   | (0.35%) |
|           |                  |                      | 0.0000  | -0.0003  | 0.0000                | 0.0000  | 0.0000  |
|           |                  |                      | 0.0002  | 0.0000   | 0.0000                | 0.0000  | 0.1176  |
|           |                  |                      | -0.0016 | 0.0000   | -0.0003               | 0.9912  | -0.0134 |
|           |                  |                      | 0.0002  | -0.0030  | -0.0043               | -0.0001 | -0.0365 |
|           |                  |                      | -0.0006 | 0.0448   | 0.0005                | -0.0054 | -0.0001 |
|           |                  |                      | -0.0093 | -0.0001  |                       |         |         |
| 1.98639   | BD(1)<br>C11–H13 | 0.7554*C<br>(57.06%) | 11s     | (30.03%) | p2.33<br>(69.91<br>%) | d0.00   | (0.06%) |
|           |                  |                      | -0.0003 | 0.5465   | 0.0412                | -0.0026 | 0.0005  |
|           |                  |                      | 0.3549  | -0.0065  | -0.0007               | 0.0069  | 0.7512  |
|           |                  |                      | 0.0245  | -0.0117  | 0.0011                | -0.0893 | -0.0029 |
|           |                  |                      | 0.0014  | -0.0001  | 0.0145                | -0.0024 | -0.0017 |
|           |                  |                      | 0.0003  | -0.0036  | -0.0004               | -0.0165 | 0.0022  |
|           |                  |                      | -0.0077 | -0.0032  |                       |         |         |
|           |                  | 0.6553*H<br>(42.94%) | 13s     | (99.94%) | p0.00<br>(0.06%)      |         |         |
|           |                  |                      | 0.9996  | 0.0094   | 0.0008                | -0.0107 | -0.0222 |
|           |                  |                      | 0.0026  |          |                       |         |         |

**Table S6.** Second-order perturbative estimates of “donor-acceptor” (bond-antibond) interactions in the NBO basis of the atoms of the formyl group of the ABP compound.

| <b>Donor NBO (i)</b> | <b>Acceptor NBO (j)</b> | <b>E(2)<br/>(kcal/mol)</b> | <b>E(j) – E(i)<br/>(a.u.)</b> | <b>F(i,j)<br/>(a.u.)</b> |
|----------------------|-------------------------|----------------------------|-------------------------------|--------------------------|
| BD(1) C11–O12        | BD*(1) C4–C5            | 1.22                       | 1.63                          | 0.04                     |
| BD(1) C11–O12        | BD*(1) C4–C11           | 1.09                       | 1.52                          | 0.04                     |
| BD(2) C11–O12        | BD*(2) C4–C5            | 5.06                       | 0.40                          | 0.04                     |
| LP(1) O12            | BD*(1) C4–C11           | 1.34                       | 1.15                          | 0.04                     |
| LP(1) O12            | BD*(1) C11–H13          | 0.53                       | 1.05                          | 0.02                     |
| LP(2) O12            | BD*(1) C4–C11           | 17.96                      | 0.72                          | 0.10                     |
| LP(2) O12            | BD*(1) C11–H13          | 23.15                      | 0.62                          | 0.11                     |
